# Supplementary material for: Computational mining of Janus Sc2C-based MXenes for spintronic, photocatalytic, and solar cell applications
Source: Royal Society of Chemistry journal article supplement (doi:10.1039/d1ta00614b), 2021-01-01
Supplement: d1ta00614b1.pdf [file d1ta00614b1.pdf]

**Supplementary material:**

**Computational mining of Janus Sc<sub>2</sub>C-based MXene for spintronic,  
photocatalytic, and solar cell applications**

Yinggan Zhang<sup>1</sup>, Baisheng Sa<sup>2,\*</sup>, Naihua Miao<sup>3</sup>, Jian Zhou<sup>3</sup> and Zhimei Sun<sup>3,\*</sup>

<sup>1</sup>*College of Materials, Fujian Provincial Key Laboratory of Theoretical and Computational Chemistry, Xiamen University, Xiamen 361005, P. R. China*

<sup>2</sup>*Key Laboratory of Eco-materials Advanced Technology, College of Materials Science and Engineering, Fuzhou University, Fuzhou 350108, P. R. China*

<sup>3</sup>*School of Materials Science and Engineering, and Center for Integrated Computational Materials Science, International Research Institute for Multidisciplinary Science, Beihang University, Beijing 100191, P. R. China*

**Corresponding authors:** [bssa@fzu.edu.cn](mailto:bssa@fzu.edu.cn) (B. Sa), [zmsun@buaa.edu.cn](mailto:zmsun@buaa.edu.cn) (Z. Sun).

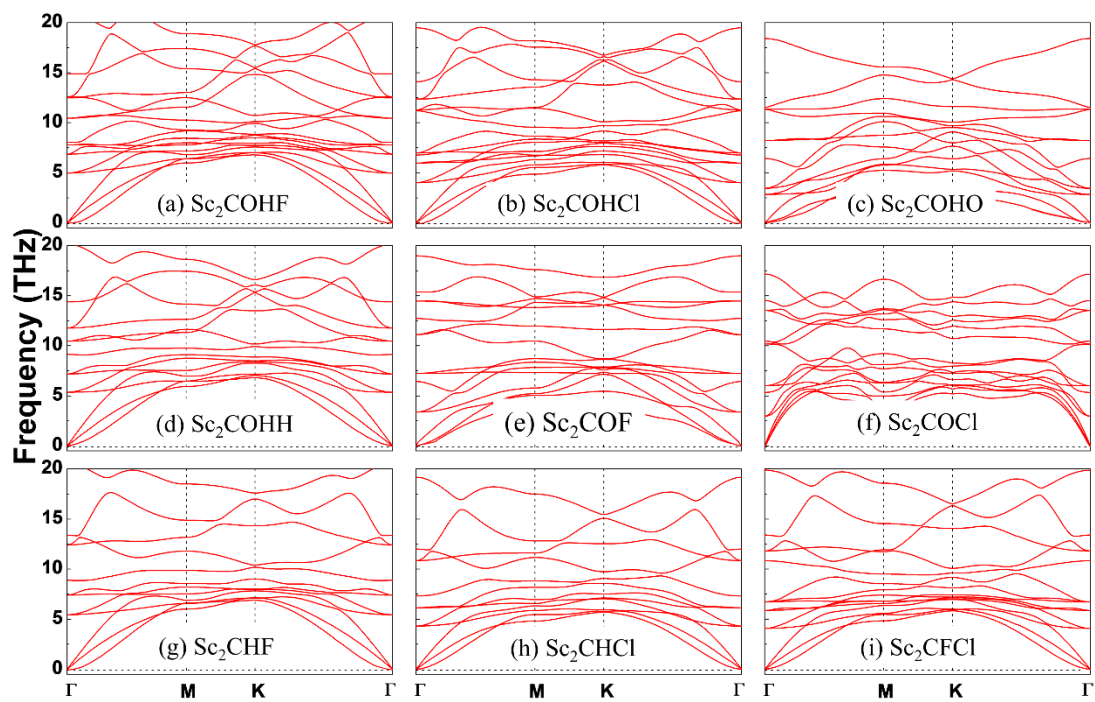

**Fig. S1** Phonon dispersion curves for (a)  $\text{Sc}_2\text{COHF}$ , (b)  $\text{Sc}_2\text{COHCl}$ , (c)  $\text{Sc}_2\text{COHO}$ , (d)  $\text{Sc}_2\text{COHH}$ , (e)  $\text{Sc}_2\text{COF}$ , (f)  $\text{Sc}_2\text{COCl}$ , (g)  $\text{Sc}_2\text{CHF}$ , (h)  $\text{Sc}_2\text{CHCl}$ , (i)  $\text{Sc}_2\text{CFCl}$ .

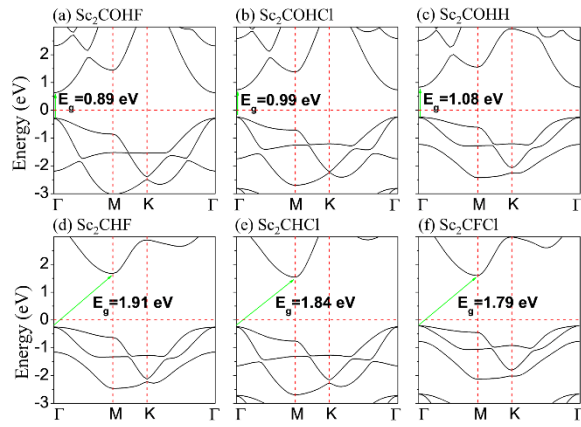

**Fig. S2** The HSE06 band structures of Janus (a)  $\text{Sc}_2\text{COHF}$ , (b)  $\text{Sc}_2\text{COHCl}$ , (c)  $\text{Sc}_2\text{COHH}$ , (d)  $\text{Sc}_2\text{CHF}$ , (e)  $\text{Sc}_2\text{HCl}$ , (f)  $\text{Sc}_2\text{CFCl}$ .

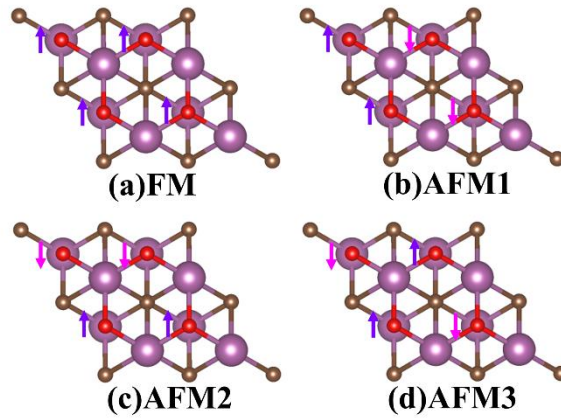

**Fig. S3** Various possible magnetic configurations of  $\text{Sc}_2\text{CTT}'$  including (a) one ferromagnetic state and (b-d) three antiferromagnetic states with up-spins ( $\uparrow$ ) and down-spins ( $\downarrow$ ) on the Sc atom.

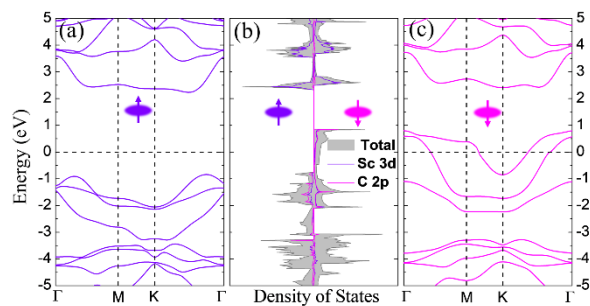

**Fig. S4** The band structure of  $\text{Sc}_2\text{COF}$  with (a) spin-up and (c) spin-down states, and (b) the spin-resolved density of states. The Fermi level is set at 0 eV as indicated by a dashed line.

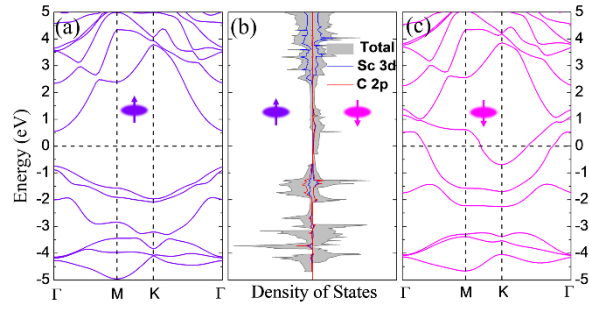

**Fig. S5** The band structure of  $\text{Sc}_2\text{COH}$  with (a) spin-up and (c) spin-down states, and (b) the spin-resolved density of states. The Fermi level is set at 0 eV as indicated by a dashed line.

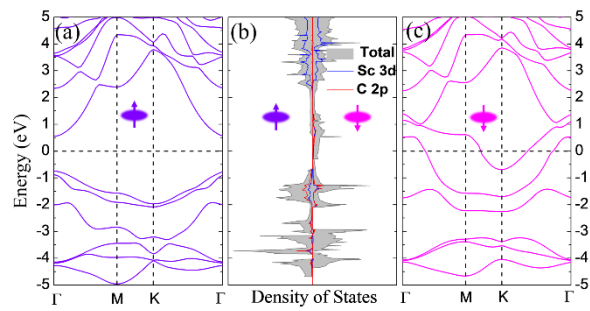

**Fig. S6** The band structure of  $\text{Sc}_2\text{COOH}$  with (a) spin-up and (c) spin-down states, and (b) the spin-resolved density of states. The Fermi level is set at 0 eV as indicated by a dashed line.

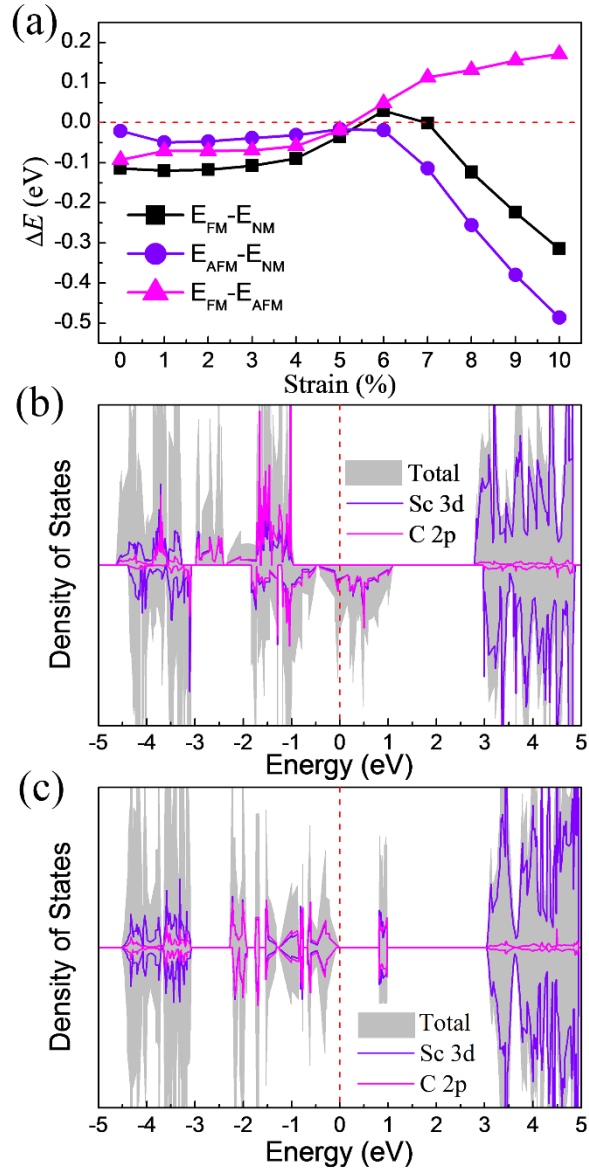

**Fig. S7** (a) The energy differences between FM, AFM and NM states of Sc<sub>2</sub>COF as a function of tensile strain. The spin-resolved density of states of Sc<sub>2</sub>COF under (b) 5% tensile strain for FM states and (c) 6% tensile strain for AFM states, respectively.



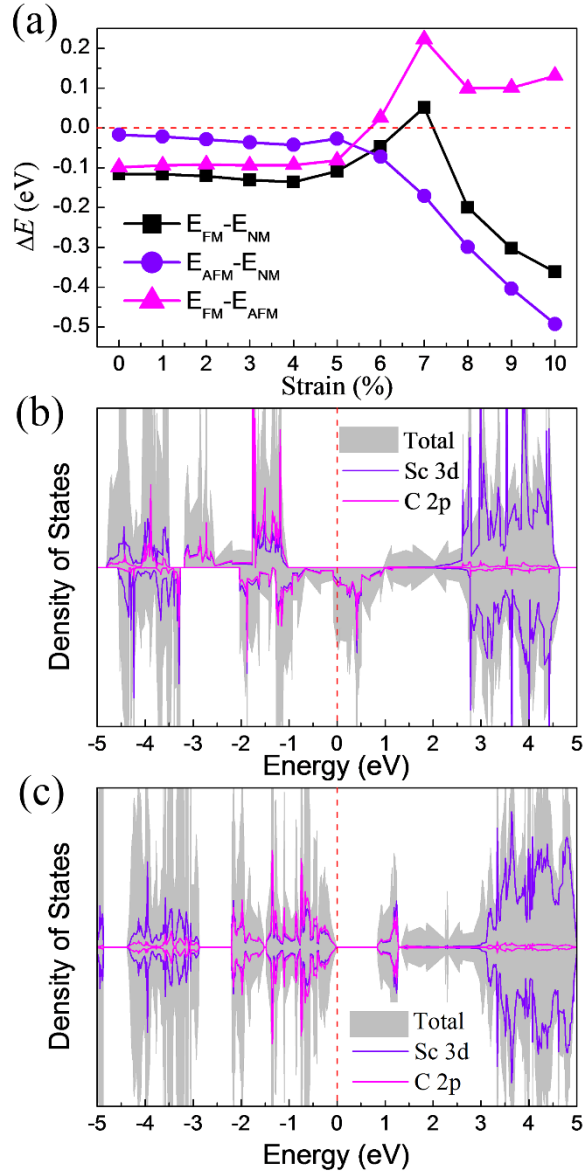

**Fig. S8** (a) The energy differences between FM, AFM and NM states of Sc<sub>2</sub>COOH as a function of tensile strain. The spin-resolved density of states of Sc<sub>2</sub>COOH under (b) 5% tensile strain for FM states and (c) 6% tensile strain for AFM states, respectively.

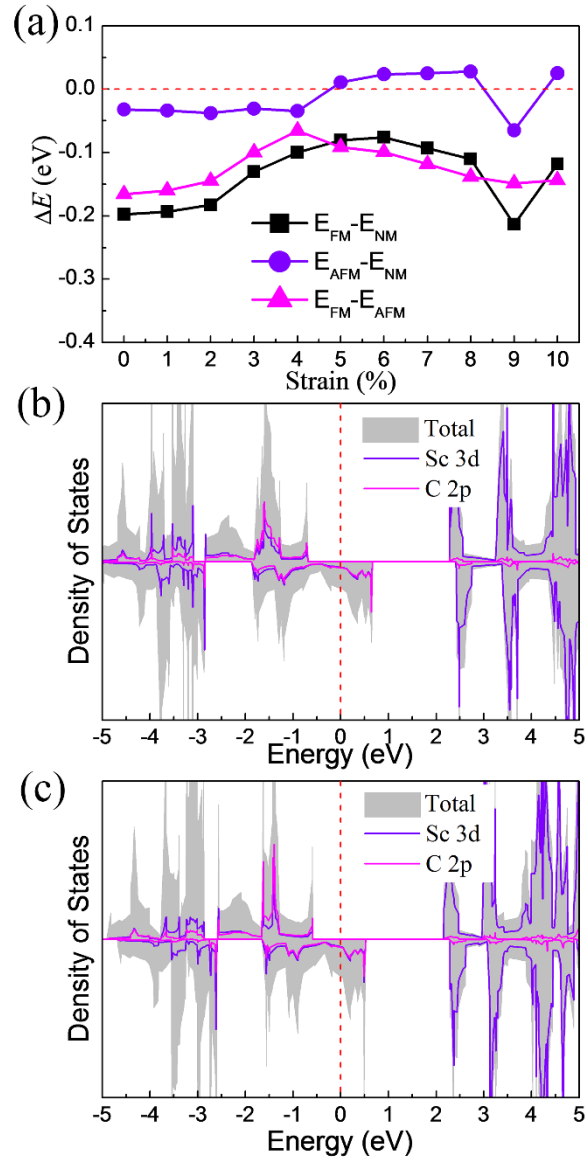

F

**Fig. S9** (a) The energy differences between FM, AFM and NM states of Sc<sub>2</sub>COH as a function of tensile strain. The spin-resolved density of states of Sc<sub>2</sub>COH under (b) 5% and (c) 10% tensile strain for FM states, respectively.

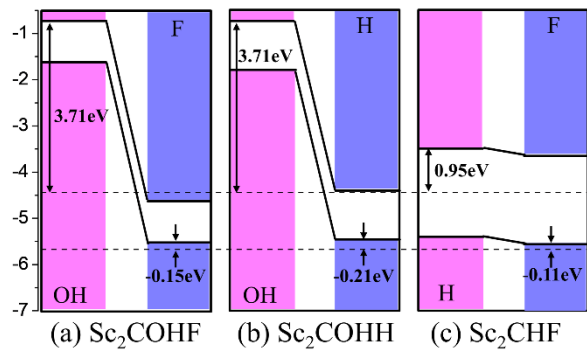

**Fig. S10** Band alignment of (a)  $\text{Sc}_2\text{COHF}$ , (b)  $\text{Sc}_2\text{COHH}$  and (c)  $\text{Sc}_2\text{CHF}$  with respect to the redox potentials of water.

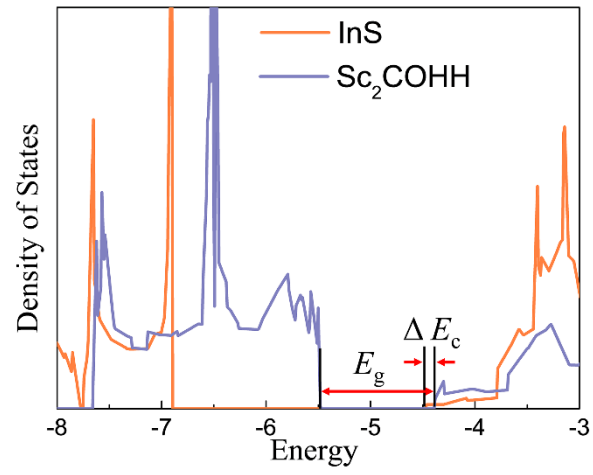

**Fig. S11** The density of states of Sc<sub>2</sub>COHH/InS heterostructure.
